# Supplementary material for: The Society for Immunotherapy of Cancer consensus statement on immunotherapy for the treatment of hematologic malignancies: multiple myeloma, lymphoma, and acute leukemia
Source: J Immunother Cancer. 2016 Dec 20;4:90. doi: 10.1186/s40425-016-0188-z (PMC5168808; doi:10.1186/s40425-016-0188-z)
Supplement: Additional file 3: — Annotated Bibliography (Myeloma), Annotated Bibliography (Lymphoma), and Annotated Bibliography (Leukemia). (ZIP 1812 kb) [file 40425_2016_188_MOESM3_ESM.zip]

Archive with 3 entries (3 files):
- Add/APPENDIX II-Supplementary Biobliography I Cancer Immunotherapy Guidelines Multiple Myeloma.pdf
- Add/APPENDIX II-Supplementary Biobliography II Cancer Immunotherapy Guidelines Lymphoma.pdf
- Add/APPENDIX II-Supplementary Biobliography III Cancer Immunotherapy Guidelines Acute Leukemia.pdf
